# Supplementary material
Source: PubMed Central journal article supplement (PMC1288009)
Supplement: pnas_0508573102_1.pdf [file pnas_0508573102_1.pdf]

a. **Platelet Factor 4** (Protein B):

```
1           11           21           31           41
1  EAEEDGDLQC LCVKTTSQVR PRHITSLEVI KAGPHCPTAQ LIATLKNGRK
51 ICLDLQAPLY KKI IKKLLLES
```

b. **Connective-Tissue Activating Peptide-III** (Protein C):

```
           1           10           20           30           40           50
           1                                       NLAKGKE
51  ESLSDLYAELRCMCIKTTSGGIHPKNIQSLEVIGKGTHCNQVEVIATLKD
101 GRKICLDPDAPRIKKIVQKKLAGDESAD
```
